# Supplementary material for: Reducing photovoltage loss at the anode contact of methylammonium-free inverted perovskite solar cells by conjugated polyelectrolyte doping
Source: Royal Society of Chemistry journal article supplement (doi:10.1039/d0ta00892c), 2020-01-01
Supplement: d0ta00892c1.pdf [file d0ta00892c1.pdf]

## Supporting Information

# Reducing photovoltage loss at anode contact of methylammonium-free inverted perovskite solar cells by conjugated polyelectrolyte doping

*He Wang*<sup>1</sup>, *Yilong Song*<sup>1</sup>, *Yifei Kang*<sup>1</sup>, *Song Dang*<sup>1</sup>, *Jing Feng*<sup>2</sup>, *Qingfeng Dong*<sup>1\*</sup>

<sup>1</sup> State Key Laboratory of Supra-molecular Structure and Materials, College of Chemistry, Jilin University, Changchun, Jilin, 130012, P. R. China.

<sup>2</sup> State Key Laboratory of Integrated Optoelectronics, College of Electronic Science and Engineering, Jilin University, Changchun, Jilin, 130012, P. R. China.

### Corresponding Authors:

\*E-mail: [qfdong@jlu.edu.cn](mailto:qfdong@jlu.edu.cn)

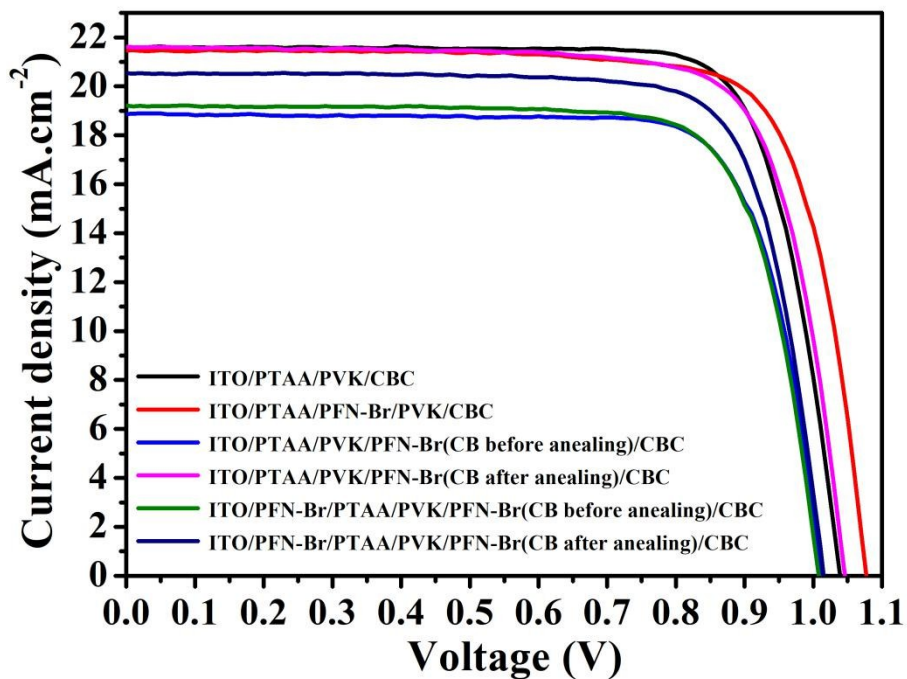

**Fig.S1** the  $J$ - $V$  curves for the devices of different constructions (CB and CBC represent chlorobenzene and C60/BCP/Cu, respectively; PFN-Br represents PFN-Br dissolved in DMF )

**Table S1.** The fitted data of TRPL of control and PFN-Br doping films.

| Delay Time | Control<br>(ns) | PFN-Br doping<br>(ns) | Proportion | Control<br>(%) | PFN-Br doping<br>(%) |
|------------|-----------------|-----------------------|------------|----------------|----------------------|
| $\tau_1$   | 306.8           | 153.2                 | A1         | 23.22          | 11.40                |
| $\tau_2$   | 832.6           | 500.9                 | A2         | 76.78          | 88.60                |
